# Supplementary material for: Visualizing arthritic inflammation and therapeutic response by fluorine-19 magnetic resonance imaging (19F MRI)
Source: J Inflamm (Lond). 2012 Jun 21;9:24. doi: 10.1186/1476-9255-9-24 (PMC3506445; doi:10.1186/1476-9255-9-24)
Supplement: Additional file 1 — Table S1. Longitudinal analysis of 19F signal in CIA rats. [file 1476-9255-9-24-S1.pdf]

**Table 1. Longitudinal analysis of  $^{19}\text{F}$  signal in CIA rats**

| Cohort              | Day | Range<br>( $^{19}\text{F}$ x10 <sup>19</sup> ) |    |      | Average $\pm$ SD<br>( $^{19}\text{F}$ x10 <sup>19</sup> ) | <i>P</i> value*                                                              |                       |
|---------------------|-----|------------------------------------------------|----|------|-----------------------------------------------------------|------------------------------------------------------------------------------|-----------------------|
| <b>Vehicle</b>      | 15  | 0.14                                           | to | 11.2 | 5.17 $\pm$ 4.55                                           | <div> <div>5.43x10<sup>-6</sup></div> <div>3.95x10<sup>-4</sup></div> </div> | 1.93x10 <sup>-6</sup> |
|                     | 22  | 6.59                                           | to | 19.2 | 11.9 $\pm$ 4.71                                           |                                                                              |                       |
|                     | 29  | 12.8                                           | to | 21.9 | 17.3 $\pm$ 3.82                                           |                                                                              |                       |
| <b>Prednisolone</b> | 15  | 0.17                                           | to | 12.1 | 4.57 $\pm$ 4.86                                           | <div> <div>NS</div> <div>NS</div> </div>                                     | NS                    |
|                     | 22  | 0.70                                           | to | 13.1 | 4.85 $\pm$ 4.63                                           |                                                                              |                       |
|                     | 29  | 0.91                                           | to | 13.8 | 5.92 $\pm$ 5.56                                           |                                                                              |                       |

\*After testing for normal distribution, two-way ANOVA was used to compare statistical significance among groups ( $P < 0.05$  considered significant). Tukey's two-tailed paired T-test was then used to compare the average signal between time points for each treatment group (critical  $P$  value  $< 0.0083$ ). SD = standard deviation, NS = not significant .
